# Supplementary material for: Lead exposure exacerbates liver injury in high-fat diet-fed mice by disrupting the gut microbiota and related metabolites
Source: Royal Society of Chemistry journal article supplement (doi:10.1039/d3fo05148j), 2024-01-01
Supplement: d3fo05148j2.xlsx [file d3fo05148j2.xlsx]

## Sheet: FMT-Alpha diversity
Chao1 index
HFD→HFD	HFD+Pb→HFD
1897.96	380.89
1822.24	1700.76
1695.98	1945.19
1859.63	1830.83
Observed_species
HFD→HFD	HFD+Pb→HFD
1683.9	294
1641	1532
1482.9	1703
1569	1451
Shannon
HFD→HFD	HFD+Pb→HFD
6.43	4.96
6.88	6.94
5.87	6.99
6.74	6.09
Simpson
HFD→HFD	HFD+Pb→HFD
0.95	0.93
0.95	0.97
0.9	0.97
0.96	0.94

## Sheet: FMT-β-diversity
OTUs_PCA							OTUs_PLS-DA
Axis1	Axis2	samples	group				Axis1	Axis2	samples	group
HFD→HFD1	-0.122897	0.166035	H_HFD1	H_HFD			HFD→HFD1	-15.9788	-19.6035	H_HFD1	H_HFD
HFD→HFD2	-0.256087	-0.209506	H_HFD2	H_HFD			HFD→HFD2	-31.4359	-2.63386	H_HFD2	H_HFD
HFD→HFD3	-0.290427	0.20571	H_HFD3	H_HFD			HFD→HFD3	-22.9041	-5.91717	H_HFD3	H_HFD
HFD→HFD4	-0.206309	-0.435734	H_HFD4	H_HFD			HFD→HFD4	-24.234	-4.91654	H_HFD4	H_HFD
HFD+Pb→HFD1	0.0285658	0.253132	HPb_HFD1	HPb_HFD			HFD+Pb→HFD1	10.3746	24.4731	HPb_HFD1	HPb_HFD
HFD+Pb→HFD2	0.587169	0.0203641	HPb_HFD2	HPb_HFD			HFD+Pb→HFD2	45.1037	-27.8104	HPb_HFD2	HPb_HFD
HFD+Pb→HFD3	0.442032	-0.132334	HPb_HFD3	HPb_HFD			HFD+Pb→HFD3	29.8786	0.721811	HPb_HFD3	HPb_HFD
HFD+Pb→HFD4	-0.182047	0.132334	HPb_HFD4	HPb_HFD			HFD+Pb→HFD4	9.19596	35.6866	HPb_HFD4	HPb_HFD

## Sheet: FMT-Phylum_relative
	p__Actinobacteriota	p__Firmicutes	p__Patescibacteria	p__Campilobacterota	p__Proteobacteria	p__Bacteroidota	p__Verrucomicrobiota	p__Deferribacterota	others
HFD→HFD1	2.35697	55.8732	0.153835	0.329646	0.0934	29.7194	0.360779	0.08058	11.0322
HFD→HFD2	1.66838	53.5254	0.00916	3.2342	0.05311	10.4809	0.965131	3.33675	26.727
HFD→HFD3	2.45403	45.2091	0.00916	0.606183	0.095231	12.5046	0.122702	2.6738	36.3252
HFD→HFD4	1.77093	58.6495	0.260054	0.813127	0.084243	13.7224	16.7515	0.027471	7.92066
HFD+Pb→HFD1	4.94103	47.2658	0.00549	0.021976	0.245403	24.9615	4.42458	0.032965	18.1012
HFD+Pb→HFD2	0.880888	13.1456	0.00183	0.293019	3.09318	77.7617	0.023808	0.404732	4.39528
HFD+Pb→HFD3	4.12241	35.3985	0	1.08783	1.17757	53.095	3.03458	0.177643	1.90645
HFD+Pb→HFD4	2.18116	57.5928	0.756355	0.130027	0.184968	18.354	0.089737	0.095231	20.6157

## Sheet: FMT-Genus_relative
	HFD→HFD1	HFD→HFD2	HFD→HFD3	HFD→HFD4	HFD+Pb→HFD1	HFD+Pb→HFD2	HFD+Pb→HFD3	HFD+Pb→HFD4
g__RF39	0	0	0	0	0	0	0	0.00216101
g__Ruminococcaceae	3.66274e-05	3.66274e-05	0	0	0	0	0	0
g__Lactococcus	0	0	0	0	0	0	5.4941e-05	0
g__Rikenella	0	9.15684e-05	0.000109882	0	9.15684e-05	1.83137e-05	0.000183137	0
g__Eubacterium_nodatum_group	0.00054941	0.000183137	0.000329646	9.15684e-05	5.4941e-05	0.000146509	0.000238078	0.00135521
g__Lachnospiraceae_UCG-001	0.000677606	0.00260054	0.000366274	0.000659292	5.4941e-05	9.15684e-05	0.00122702	5.4941e-05
g__Oscillibacter	0.00230752	0.00606183	0.00190462	0.00858911	0.000311333	0.000421215	0.00106219	0.00631822
g__Tuzzerella	0.00232584	0.00221595	0.0013369	0.00232584	0	0.00020145	0.000970625	0.000842429
g__Ruminococcus	0.127005	0.00384587	0.0523954	0.0537506	0.0739689	0.000366274	0.000879056	0.103912
g__Anaerovorax	0.000256391	0.00020145	0.000109882	0.000274705	0	0	3.66274e-05	0.000329646
g__Allobaculum	3.66274e-05	0	9.15684e-05	0	0	0	0	0
g__Fusicatenibacter	0.00150172	0	0.000769174	0.000311333	0	0	0	0.000604351
g__Anaerostipes	0	0.000146509	0	3.66274e-05	0	0.000109882	0.000256391	7.32547e-05
g__Eubacterium_fissicatena_group	0.0046883	0.00142847	0.0330196	0.0517728	0.010219	0.0324518	0.00891876	0.0779613
g__Massilia	0	5.4941e-05	1.83137e-05	0	1.83137e-05	1.83137e-05	1.83137e-05	1.83137e-05
g__Azotobacter	0	0	3.66274e-05	0	9.15684e-05	3.66274e-05	3.66274e-05	7.32547e-05
g__Harryflintia	0.000659292	0.000824115	0.00139184	0.000311333	0.00117208	7.32547e-05	0.000256391	0.00100725
g__Eubacterium_oxidoreducens_group	0.00102557	0.0016116	0.00135521	0.0012087	0	0.000183137	0.00020145	0.00111713
g__Shinella	0	0	1.83137e-05	0	0.000109882	0	0	0
g__Faecalibacterium	1.83137e-05	0.000109882	0.000146509	1.83137e-05	0	9.15684e-05	1.83137e-05	0.000146509
g__Butyricicoccus	9.15684e-05	7.32547e-05	0	0	0	0	0.000128196	0
g__Dielma	0	0	3.66274e-05	0	0.00141015	0	0	0
g__UCG-009	0.000824115	0.000622665	0.000293019	0.000531097	3.66274e-05	0	3.66274e-05	0.000567724
g__Dubosiella	0.000494469	0.000183137	0.00199619	5.4941e-05	0	0	0.000128196	0.00157498
g__Bacteroides	0.117849	0.0256208	0.0822101	0.0498681	0.112794	0.163175	0.134953	0.0752692
g__Enterococcus	3.66274e-05	5.4941e-05	0.000183137	0.000677606	0.000952311	0.00109882	0.00159329	0.000238078
g__Lachnospiraceae_UCG-004	0	3.66274e-05	9.15684e-05	0	0	0	0	1.83137e-05
g__Methylobacterium-Methylorubrum	1.83137e-05	0	0	0	1.83137e-05	0	0	0
g__Alloprevotella	0.0150172	0.00344297	0.00472493	0.00847923	0.0100908	0.115578	0.0312248	0.0448868
g__Blautia	0.0142847	0.0246868	0.0617537	0.0219947	0.0111164	0.00624496	0.0543733	0.00981613
g__Brevibacillus	0	1.83137e-05	0	0	5.4941e-05	0	0	0
g__Novosphingobium	0	1.83137e-05	0	0	1.83137e-05	1.83137e-05	3.66274e-05	0
g__Nakamurella	0	0	0	0	7.32547e-05	0	0	0
g__Christensenella	0.000109882	3.66274e-05	0.000146509	3.66274e-05	0.000109882	1.83137e-05	5.4941e-05	9.15684e-05
g__Lachnospiraceae_NK4A136_group	0.0158963	0.0859095	0.0183503	0.0612043	0.00434034	0.00538422	0.00639147	0.129386
g__Erysipelatoclostridiaceae	0.00102557	0.00020145	0.00181305	0.000439528	0.00181305	0.000293019	0.00368105	0.00212439
g__Enterobacter	0	0	1.83137e-05	0	1.83137e-05	0	0.000128196	0
g__Flavobacterium	0	0	0	0	0	0	1.83137e-05	1.83137e-05
g__Subgroup_7	0	0	0	1.83137e-05	0	0	0	3.66274e-05
g__ASF356	0	0.000128196	0	0.000293019	0	0	0.00054941	0
g__Coprococcus	1.83137e-05	0.000128196	0	0	0	0	0	1.83137e-05
g__Prevotellaceae_Ga6A1_group	0.000677606	0.000512783	0.000366274	0.000769174	0.0017398	0.00538422	0.00336972	0.00148341
g__UCG-010	0.000512783	0.000988939	0.000421215	0.000531097	5.4941e-05	0.000750861	0.000659292	0.00102557
g__Peptococcus	0.00390081	0.00329646	0.00304007	0.00439528	0.00130027	0.000512783	0.000787488	0.00256391
g__Mycobacterium	5.4941e-05	0	1.83137e-05	1.83137e-05	0	1.83137e-05	9.15684e-05	0
g__Subdoligranulum	5.4941e-05	0	1.83137e-05	1.83137e-05	7.32547e-05	0	1.83137e-05	9.15684e-05
g__Ruminococcus_gnavus_group	0.00135521	0.00245403	0.000164823	0.00100725	0	0.000128196	0.000219764	0.00109882
g__Weissella	0	0	0	0	0	0.000128196	0	0
g__UCG-002	0	0.000109882	0.000146509	0.000109882	0	0	0	5.4941e-05
g__Eubacterium_xylanophilum_group	0.000164823	0.00280199	9.15684e-05	9.15684e-05	0	1.83137e-05	1.83137e-05	0.000219764
g__UCG-005	0.000586038	0.00089737	0.000329646	0.00404732	7.32547e-05	0.000238078	0.000567724	0.00256391
g__Pseudomonas	1.83137e-05	1.83137e-05	3.66274e-05	0	0.000109882	0	1.83137e-05	1.83137e-05
g__Marvinbryantia	9.15684e-05	0	0	0.00034796	0	0	0	0
g__Eubacterium_coprostanoligenes_group	0.0140832	0	0.00915684	0.00943154	5.4941e-05	1.83137e-05	1.83137e-05	0.0105853
g__Colidextribacter	0.0289722	0.0445572	0.0267197	0.0293935	0.0343381	0.00518277	0.0207677	0.0270127
g__Mucispirillum	0.000805802	0.0333309	0.026738	0.000274705	0.000329646	0.00404732	0.00177643	0.000952311
g__Anaerotruncus	0.00089737	0.00148341	0.000750861	0.0012087	0.000293019	1.83137e-05	0.00232584	0.00124533
g__Anaeroplasma	0	0	0	0	0	0.000109882	0	0
g__Gordonibacter	7.32547e-05	0	0.000109882	7.32547e-05	0.000183137	7.32547e-05	0.000109882	0.000109882
g__Lactobacillus	0.100066	0.0122885	0.0283313	0.0175994	0.0614607	0.0102373	0.0476705	0.0150538
g__Monoglobus	0	0.000146509	0.000384587	0	0	0	0	0
g__Intestinimonas	0.000146509	0.000915684	0.000183137	0.00300344	0	3.66274e-05	0.000586038	0.000311333
g__Staphylococcus	0.000128196	0.000109882	0.00020145	0	0.000146509	3.66274e-05	0.000164823	0.000256391
g__Pajaroellobacter	0	0	0	1.83137e-05	1.83137e-05	0	0	0
g__Parvibacter	0.000164823	0.000128196	0.000183137	0.000128196	0.000128196	9.15684e-05	0.000329646	9.15684e-05
g__Planomicrobium	0	0	1.83137e-05	0	0	7.32547e-05	0	0
g__Acinetobacter	5.4941e-05	0	1.83137e-05	0	1.83137e-05	5.4941e-05	3.66274e-05	0
g__Oscillospira	5.4941e-05	0.000567724	7.32547e-05	0.000640979	0	0	0	0.000238078
g__Prevotella	0	0	0	0	5.4941e-05	1.83137e-05	0	0
g__Lachnospiraceae_AC2044_group	3.66274e-05	0	0.000219764	7.32547e-05	0	5.4941e-05	0	0.000109882
g__Turicibacter	0	5.4941e-05	0	0	0	0	0	1.83137e-05
g__Eubacterium_brachy_group	0.000714233	0.00300344	0.00144678	0.00208776	0.000421215	0.000164823	0.00122702	0.000714233
g__Pseudolabrys	1.83137e-05	0	0	0	1.83137e-05	0	0	0
g__Exiguobacterium	0	0	1.83137e-05	0	0	5.4941e-05	0	1.83137e-05
g__Family_XIII_UCG-001	1.83137e-05	0.00020145	5.4941e-05	0.000109882	0	0	0	3.66274e-05
g__Paenibacillus	0	0	0.000219764	0	0.000842429	0	0	0
g__Akkermansia	0.00360779	0.00965131	0.00122702	0.167515	0.0442458	0.000238078	0.0303458	0.00089737
g__Clostridia_vadinBB60_group	3.66274e-05	0.00146509	0.000384587	0.000402901	1.83137e-05	0.00379093	0.0121969	0.000915684
g__Negativibacillus	9.15684e-05	0.000640979	0.000714233	0.000128196	5.4941e-05	1.83137e-05	9.15684e-05	0.000128196
g__GCA-900066575	0.00362611	0.00397407	0.00487144	0.00333309	0.00139184	0.000128196	0.000915684	0.0115376
g__Catenibacillus	0	0	3.66274e-05	0	0	0	0	0
g__Saccharofermentans	0	0	0	3.66274e-05	0	0	0	0
g__uncultured	0.277489	0.48002	0.460882	0.268002	0.272892	0.0800308	0.0978133	0.281774
g__Incertae_Sedis	0.000586038	0.000933998	0.000970625	0.00113545	9.15684e-05	0.000476156	0.000164823	0.000384587
g__Prevotellaceae_UCG-004	0	0	0	0	0	3.66274e-05	0	0
g__Butyricimonas	0.0052194	0.0026738	0.00305838	0.00314995	0.0238261	0.0486411	0.0288257	0.00439528
g__Myxococcus	0	0	0	5.4941e-05	0	0	0	0
g__Microbacterium	0	0	3.66274e-05	0	3.66274e-05	1.83137e-05	0	0
g__Hydrogenoanaerobacterium	0	0	1.83137e-05	1.83137e-05	0	0	0	0
g__Erysipelatoclostridium	0.00034796	0.00150172	0.00100725	0.0146143	0.00278368	0.000457842	0.0115376	0.00324152
g__Butyrivibrio	0	1.83137e-05	0	3.66274e-05	0	0	0	0
g__Lachnospiraceae_NC2004_group	0.000164823	3.66274e-05	3.66274e-05	1.83137e-05	0	0	0	0
g__Family_XIII_AD3011_group	0.000164823	0.000677606	0.000750861	0.000274705	1.83137e-05	7.32547e-05	0.000238078	0.000860743
g__Enterorhabdus	0.0224526	0.0156765	0.0218299	0.0150538	0.0351806	0.00477987	0.0292653	0.0188997
g__Shuttleworthia	0	3.66274e-05	0	0	0	0	0	0
g__Helicobacter	0.00329646	0.032342	0.00606183	0.00813127	0.000219764	0.00293019	0.0108783	0.00130027
g__Clostridium_sensu_stricto_1	0	0	5.4941e-05	0	0	0	0	0
g__Clostridia_UCG-014	0.0037543	0.000164823	0.00131858	0.00195956	0.00054941	0	3.66274e-05	0.00824115
g__Chloroplast	0.000714233	0.000842429	0	0	0	0	0	0
g__Ruminococcus_torques_group	0.00609845	0.00327815	0.00598857	0.0033514	0.00221595	0.000860743	0.0013369	0.011794
g__Desulfovibrio	0.00847923	0.0230935	0.0223427	0.00591532	0.0129295	0.00181305	0.00177643	0.00747198
g__Coriobacteriaceae_UCG-002	0.00054941	0.000750861	0.00190462	0.00219764	0.0132957	0.00380924	0.0109882	0.00206945
g__Tyzzerella	0.000128196	1.83137e-05	0.000146509	0.000567724	0	0	0	1.83137e-05
g__Defluviitaleaceae_UCG-011	0	0	9.15684e-05	0.000164823	0	0	0	0.000311333
g__Alistipes	0.00520108	0.00349791	0.00137353	0.0020145	0.0283129	0.0373233	0.0189547	0.0046883
g__Lachnospiraceae_FCS020_group	0.000183137	0.000164823	5.4941e-05	0.000128196	0	1.83137e-05	1.83137e-05	5.4941e-05
g__Christensenellaceae_R-7_group	0.000384587	0.00172149	0.000769174	0.000879056	0.000128196	0	0.000128196	0.00152004
g__Lachnospiraceae_UCG-006	0.00717896	0.0101641	0.0103472	0.00249066	0.000293019	0.000128196	0.00175811	0.00142847
g__Dorea	0.000293019	0.000512783	1.83137e-05	0.000183137	0	0	0.000146509	5.4941e-05
g__Azospirillum	0	0	0.000164823	0	0	1.83137e-05	0	0
g__Muribaculaceae	0.140374	0.0629807	0.0278368	0.0684565	0.0541169	0.357391	0.282928	0.0422497
g__Candidatus_Saccharimonas	0.00153835	9.15684e-05	9.15684e-05	0.00260054	5.4941e-05	1.83137e-05	0	0.00756355
g__Lachnoclostridium	0.0137719	0.0334957	0.0153469	0.0205663	0.0143396	0.00538422	0.00822284	0.0118306
g__Clostridium_methylpentosum_group	3.66274e-05	0	1.83137e-05	0	0	0.000128196	7.32547e-05	0
g__Bilophila	0.0020145	0.0021427	0.00175811	0.000567724	5.4941e-05	0.00034796	0.00034796	0.0013369
g__UBA1819	0.00069592	9.15684e-05	0.00135521	0.000109882	0.000567724	0.000256391	0.000164823	0.000714233
g__Lachnospiraceae_NK4B4_group	7.32547e-05	0	1.83137e-05	0.000164823	0	0	0	0.000146509
g__Acetatifactor	0.00108051	0.000146509	0.000512783	0.0081679	0	0	3.66274e-05	0.00106219
g__Erysipelotrichaceae	1.83137e-05	3.66274e-05	0	0	0	0	0	0
g__Odoribacter	0.00219764	0.000274705	0.000274705	0	0.00203282	0.000421215	0.000457842	0.000366274
g__Paludicola	0	1.83137e-05	3.66274e-05	3.66274e-05	0	0	1.83137e-05	5.4941e-05
g__Lachnospiraceae	1.83137e-05	0	3.66274e-05	0	0	0	1.83137e-05	1.83137e-05
g__Eubacterium_siraeum_group	0	0	3.66274e-05	0	0	0	0	0
g__Faecalibaculum	0.00287525	0.00972456	0.0120504	0.0225075	0.136345	0.0279833	0.0728884	0.0198154
g__NK4A214_group	0.00620834	0.0021427	0.00349791	0.00474324	0	0.000329646	0.00293019	0.00575049
g__Anaerosporobacter	0	0	3.66274e-05	0	0	0	0	0
g__Rikenellaceae_RC9_gut_group	0.00719727	0.00368105	0.00305838	0.00184968	0.00976119	0.0302359	0.014248	0.00470661
g__Pseudoxanthomonas	3.66274e-05	0	3.66274e-05	0	0	5.4941e-05	1.83137e-05	0
g__Lachnospiraceae_UCG-008	0.000439528	0.00205113	0.000384587	0.00408395	9.15684e-05	1.83137e-05	0.000164823	0.000586038
g__Candidatus_Soleaferrea	0.000567724	0.000164823	0.00109882	0.000366274	0.000732547	0.000293019	0.000750861	0.00108051
g__unidentified	0.000109882	3.66274e-05	1.83137e-05	0	3.66274e-05	0	0	0
g__A2	3.66274e-05	0.000219764	0.000109882	0.00089737	0	0	0.0030767	0
g__Escherichia-Shigella	3.66274e-05	3.66274e-05	0.000311333	1.83137e-05	0.000384587	0.0224343	0.00194125	5.4941e-05
g__Barnesiella	0.000640979	0.000402901	0.000329646	0.000933998	0	0.00175811	0.000933998	0.000128196
g__Streptococcus	0.00135521	0.00190462	0.00159329	0.00054941	0.00543916	0.000293019	0.00256391	0.00157498
g__Parabacteroides	0.00238078	0.00153835	0.00162992	0.00153835	0.00457842	0.0128379	0.0133324	0.00501795
g__Ochrobactrum	0	0	1.83137e-05	0	0	0	0	1.83137e-05
g__Roseburia	0.00584206	0.0165189	0.0175628	0.0217383	0.00238078	0.000732547	0.00902864	0.0080397
g__Proteus	0	0	0	1.83137e-05	0	1.83137e-05	1.83137e-05	0

## Sheet: FMT-SCFAs
	HFD→HFD			HFD+Pb→HFD
Total-SCFAs	0.5813	1.01846	1.34482	0.01356	0.33872	0.42
Acetic acid	0.45479	0.68454	0.91022	0.01181	0.21522	0.21673
Propionic acid	0.08272	0.1759	0.25124	0.0008	0.0508	0.04888
Butyric acid	0.02451	0.10466	0.11453	2e-05	0.0434	0.08018

## Sheet: ABX-Alpha diversity
	ABX-HFD			ABX-HFD+Pb
Chao1 index	193.92	143.2	139.5	113.5	150.27	231.22	118.46
Observed_species	186	108	108	106	93	202	85
Shannon	2.59	3.47	0.76	3.05	3.01	2.81	2.8
Simpson	0.64	0.79	0.18	0.82	0.79	0.77	0.8

## Sheet: ABX-β-diversity
PCoA
pc	V1	V2	V3	group
ABX_HFD1	-0.142843	0.00424848	-0.287662	AB_HFD
ABX_HFD2	-0.102036	0.0364684	-0.308099	AB_HFD
ABX_HFD3	0.601343	0.439606	0.0493204	AB_HFD
ABX_HFD+Pb1	-0.210863	-0.00146143	0.238674	AB_HPb
ABX_HFD+Pb2	-0.224673	0.00511231	0.0962182	AB_HPb
ABX_HFD+Pb3	-0.216521	0.00888022	0.00619848	AB_HPb
ABX_HFD+Pb4	-0.216433	0.00673761	0.18401	AB_HPb

## Sheet: ABX-Phylum_relative
	p__Fibrobacterota	p__Cyanobacteria	p__Proteobacteria	p__Verrucomicrobiota	p__Bacteroidota	p__Firmicutes	p__Actinobacteriota	others
ABX_HFD1	0	0.10303	7.3019	0.08395	0.13165	88.6493	2.84482	0.88531
ABX_HFD2	0.39877	1.46534	9.50945	0.00191	0.0229	83.0856	4.83677	0.67925
ABX_HFD3	0	0	0.54378	0.00382	0.07441	98.2179	1.13907	0.02099
ABX_HFD+Pb1	0	0.03244	0.54759	0.00382	0.10876	98.9163	0.2862	0.10494
ABX_HFD+Pb2	0	0.00191	4.78907	0.00191	0.0248	94.5622	0.5247	0.0954
ABX_HFD+Pb3	0	0	28.7459	0.00382	0.17554	69.1057	1.7897	0.17935
ABX_HFD+Pb4	0	0	22.6136	0	0.03244	76.337	1.01315	0.00382

## Sheet: ABX-Genus_relative
	ABX_HFD1	ABX_HFD2	ABX_HFD3	ABX_HFD+Pb1	ABX_HFD+Pb2	ABX_HFD+Pb3	ABX_HFD+Pb4
g__Pigmentiphaga	9.53998e-05	0	0	0	0	0	0
g__Caproiciproducens	0	9.53998e-05	3.81599e-05	0	0	0	0
g__Agromyces	0	0	3.81599e-05	0	0	0	0
g__Niastella	0.00022896	0	0	0	0	0	0
g__Bacteroides	0.000324359	5.72399e-05	3.81599e-05	1.908e-05	5.72399e-05	0.000286199	0.0001908
g__Staphylococcus	0.00013356	0	1.908e-05	0	0	1.908e-05	3.81599e-05
g__UBA1819	0	1.908e-05	0	0.0574116	0.018622	0.0182404	0.0621053
g__Christensenellaceae	0	0	0	0	0	0	0
g__Thermoactinomyces	0.00011448	0	0	0	0	0	0
g__OM27_clade	7.63199e-05	0	0	0	0	0	0
g__Gastranaerophilales	0	0	0	0	0	0	0
g__Streptomyces	0.00217512	0.00887218	0.00015264	7.63199e-05	0.000534239	0.00015264	5.72399e-05
g__Nocardiopsaceae	0	0	0	0.00013356	0	0	3.81599e-05
g__Lachnospiraceae_NK4A136_group	0	9.53998e-05	9.53998e-05	0.00020988	0.00015264	0.00686879	0.000934918
g__Ochrobactrum	0.000896758	0.00492263	1.908e-05	3.81599e-05	1.908e-05	3.81599e-05	3.81599e-05
g__Alistipes	5.72399e-05	0	0.000648719	0.000438839	1.908e-05	9.53998e-05	5.72399e-05
g__NB1-j	0	3.81599e-05	0	0	0	0	0
g__Anaerospora	0.00022896	0	0	0	0	3.81599e-05	0
g__Candidatus_Saccharimonas	0	0	0	0.0001908	0	0	0
g__Lachnospiraceae_UCG-001	0	0	0	0	0	0	0
g__Clostridium_sensu_stricto_12	0	0	0	0	0	3.81599e-05	0
g__Pajaroellobacter	0.000801358	0	0	0	0	0	0
g__Enterococcus	0.576139	0.408178	0.0113526	0.324302	0.402473	0.360039	0.333499
g__Lactobacillus	0.00625823	0.0442274	0.906565	0.000915838	1.908e-05	0.000610559	3.81599e-05
g__BIrii41	3.81599e-05	0	0	0	0	0	0
g__Allobaculum	0	0	0	0	0.000305279	0.00024804	0.00017172
g__Terrisporobacter	0.00017172	0	0	0.0364046	0.019099	0.00122112	3.81599e-05
g__Pseudoxanthomonas	0	0.00356795	0	0.000496079	0	0	0
g__Nonomuraea	0.00013356	0	0	0	0.00013356	0.000553319	0
g__Trichococcus	0	0	0	0	0	0	0
g__Legionella	5.72399e-05	0	0	0	0	0	0
g__Allorhizobium-Neorhizobium-Pararhizobium-Rhizobium	0.000286199	0.0013356	1.908e-05	0.00013356	0.000305279	0.00015264	5.72399e-05
g__Paenibacillus	0.00351071	0.018126	0.00024804	0.000305279	0.000286199	0.00154548	0
g__Anaerosporobacter	0	0	0	0	0	0.00022896	1.908e-05
g__Paraclostridium	0	0	0	0	0	0	0
g__Pseudomonas	0.000286199	0.0167522	9.53998e-05	0.00158364	0.00555227	9.53998e-05	0.000267119
g__Ruminococcaceae	0	0	0	0	0	0	0
g__Enterorhabdus	0.0148824	0.00677339	0.00955906	0.000648719	0.0020988	0.0158364	0.00986434
g__Pseudonocardiaceae	0.000457919	0	0.00024804	0	0	5.72399e-05	0
g__Eubacterium_brachy_group	3.81599e-05	0	0	0	0	0	0
g__Faecalitalea	0	0	0	0	0	0	0.00011448
g__Ruminococcus_torques_group	0.00717407	0.00291923	0.00160272	0.0213123	0.0368243	0.0135086	0.00826162
g__Erysipelatoclostridiaceae	0	0	0.00013356	0	0	0	0
g__BBMC-4	0	0.00398771	0	0	0	0	0
g__Fusicatenibacter	0	0	0	0	0	0	0
g__Prevotellaceae_NK3B31_group	0	1.908e-05	0	0	0	0	0
g__Gordonia	7.63199e-05	0	0	0	0	0	0
g__Streptococcus	0.00020988	0.00280475	0.00015264	0	0	0	0
g__Clostridium_sensu_stricto_13	1.908e-05	1.908e-05	0	0.158421	0.172159	0.00471275	0.00446471
g__Eubacterium_coprostanoligenes_group	0	0	0	0	0	0	0
g__Christensenella	0	0	0	0	0	0	0
g__Saccharomonospora	0.00017172	0	0	0	0	0	0
g__SM1A02	0	0	0	0	0	3.81599e-05	0
g__Mycobacterium	0.00164088	3.81599e-05	0.00013356	0	0.00125928	7.63199e-05	0
g__Propionivibrio	0	0	0	0	0	0	0
g__Aliterella	0	0	0	0.000324359	0	0	0
g__Filomicrobium	0.000992158	0	0	0	0	3.81599e-05	0
g__Morganella	0.00364427	0.00684971	0.00108756	0.000591479	0.0250902	0.00116388	0.00186984
g__Peptococcus	0	0	0	0	0	3.81599e-05	0
g__JG30-KF-CM45	9.53998e-05	0	0	0.00011448	0	0	0
g__Mitochondria	0	7.63199e-05	0	3.81599e-05	0.00022896	0	0
g__Stenotrophomonas	0.00129744	0.0421667	0.000324359	0	0	0	0
g__Dubosiella	0.000591479	0	5.72399e-05	0.00148824	0.00280475	0.00389231	0.0163324
g__Lachnospiraceae_NC2004_group	0	0	0	0.00015264	5.72399e-05	0	0
g__Prevotella	0	0	0	0	0	0	0
g__Ellin6055	0.00020988	0	0	1.908e-05	0	1.908e-05	0
g__Roseomonas	0	0	1.908e-05	0	0	3.81599e-05	0
g__Devosia	0	0	0	0	0	3.81599e-05	0
g__Flavobacterium	7.63199e-05	0	0	0	0	0	0
g__Achromobacter	0	0.00017172	0	0	0	0	0
g__Acinetobacter	0	0	0	0	1.908e-05	0	0
g__Coriobacteriaceae_UCG-002	1.908e-05	0	5.72399e-05	0	0	0	0
g__unidentified	0	0	0	0.000267119	0	0.00131652	3.81599e-05
g__IMCC26207	0.00017172	0	0	0	0	0	0
g__UCG-009	0	0	0	0	0	0	0
g__Chroococcidiopsis_PCC_7203	0	0.0107993	0	0	0	0	0
g__Eubacterium_siraeum_group	0	0	0	0	0	0	0
g__Aeribacillus	0.0001908	0	1.908e-05	0	0.000419759	0	1.908e-05
g__Pseudoclostridium	7.63199e-05	0	0	0	0	0	0
g__Azotobacter	1.908e-05	1.908e-05	5.72399e-05	0	0	1.908e-05	0
g__Diaminobutyricimonas	0	0	0	0.00017172	0	3.81599e-05	3.81599e-05
g__Helicobacter	0.000324359	0.00673523	7.63199e-05	0	0	0	0
g__Eubacterium_nodatum_group	0	0	1.908e-05	0	0	0	0
g__Chloroplast	0	1.908e-05	0	0	1.908e-05	0	0
g__Procabacter	0	0	0	0	0	3.81599e-05	0
g__mle1-27	0.00015264	0	0	0	0	0	0
g__Mucispirillum	0	0	0	0	0.000896758	0	0
g__R7C24	5.72399e-05	0	0	0	0	0	0
g__Prevotellaceae_Ga6A1_group	0	0	0	0	0	0	0
g__Sphingobium	0	0	0	0	1.908e-05	3.81599e-05	0
g__Gordonibacter	0	0	1.908e-05	0	0	0	0
g__Clostridia_UCG-014	0.00011448	9.53998e-05	0	0.00013356	0	5.72399e-05	1.908e-05
g__UCG-010	0	0	0	0	0	1.908e-05	0
g__Brachybacterium	3.81599e-05	0	3.81599e-05	0	0	0	0
g__Intestinibacter	0	0	0	0	0	0	0
g__Alloprevotella	0	1.908e-05	3.81599e-05	1.908e-05	1.908e-05	5.72399e-05	0
g__Microbacterium	0	0	0	0.00015264	5.72399e-05	9.53998e-05	5.72399e-05
g__Chelativorans	0.00202248	0	0	0	0	1.908e-05	0
g__Subdoligranulum	3.81599e-05	5.72399e-05	0	0	0	0	0
g__Cutibacterium	0	0.00129744	0	0.00017172	0	0	0
g__Massilia	0	0	0	0	0	1.908e-05	0
g__Enterobacter	0.00013356	0	0.00318635	0.000476999	0	0.000496079	0.00011448
g__Rhodoplanes	0.00020988	0	0	0	0	0	0
g__Akkermansia	0.0001908	1.908e-05	3.81599e-05	3.81599e-05	1.908e-05	0	0
g__Rhodobacter	0	1.908e-05	1.908e-05	0	1.908e-05	7.63199e-05	1.908e-05
g__Thermobifida	0	0	0	0	0	1.908e-05	0
g__Qingshengfania	0	0	0	0	0	3.81599e-05	0
g__LD29	0.0001908	0	0	0	0	0	0
g__Clostridia_vadinBB60_group	0	0	0	0	0	0	0
g__Saccharopolyspora	0.00351071	0.0211788	0.000839518	0	0.000667799	0.000725039	5.72399e-05
g__Romboutsia	5.72399e-05	0	3.81599e-05	1.908e-05	0	0.000362519	3.81599e-05
g__Candidatus_Xiphinematobacter	0.000419759	0	0	0	0	0	0
g__Vulgatibacter	0.000820438	0	1.908e-05	0	0	0	0
g__Rhodopseudomonas	0	1.908e-05	0	9.53998e-05	0	0	0
g__Thermobacillus	0.00129744	0	5.72399e-05	0	0	0	0
g__Faecalibacterium	3.81599e-05	1.908e-05	1.908e-05	0	0	0	0
g__Agathobacter	0	3.81599e-05	0	0.00868138	0.000476999	7.63199e-05	0.000801358
g__Pseudoscardovia	0	0	0	5.72399e-05	0	0	0
g__Caloramator	0	0.00267119	0	0	0	0	0
g__Bryobacter	0.00013356	0	0	0	0	0	0
g__Starkeya	3.81599e-05	0.00555227	0	0	0	0	0
g__Arenimonas	0	0	0	0	0	1.908e-05	1.908e-05
g__Alcaligenes	0	0	0	0	0.00444563	0	7.63199e-05
g__Desulfovibrio	3.81599e-05	0	0	3.81599e-05	1.908e-05	0	0
g__Novosphingobium	1.908e-05	0	0	0	0.000648719	0	1.908e-05
g__Aquamicrobium	5.72399e-05	0	0	0	0	5.72399e-05	0
g__Erysipelatoclostridium	0.101582	0.172941	0.0236019	0.0496079	0.061094	0.115033	0.0246704
g__Lachnoclostridium	0.0246132	0.00240408	0.0020988	0.19784	0.085421	0.0347255	0.145924
g__Parasutterella	0	0	0	0.00141192	0.00902482	9.53998e-05	0
g__Turicibacter	0.00011448	0	3.81599e-05	3.81599e-05	0	7.63199e-05	0
g__Alkanindiges	0	3.81599e-05	0	0	0	0	0
g__NK4A214_group	0	0	0	0	0	0	0
g__Ruminiclostridium	0.0001908	0.00503711	1.908e-05	0	0	0	0
g__Thermopolyspora	0.00127836	0.000782279	0.00015264	0	0	0	0
g__Lachnospiraceae_UCG-008	0	0	0	0	0	0	0
g__Colidextribacter	0.000725039	0	3.81599e-05	0	0	0.000457919	0.000438839
g__Bacillus	0.0015264	0.000267119	3.81599e-05	0.000419759	0.000305279	0.000419759	7.63199e-05
g__Verticiella	0.00020988	0	0	0	0	0	0
g__UCG-005	0	0	0	0.00534239	0.000858598	3.81599e-05	3.81599e-05
g__GCA-900066575	0	0	0	0.0020988	0.00494171	0.00017172	0
g__Incertae_Sedis	0.00020988	0	0.00017172	0.00511343	0.0121921	0.00959722	0.0173246
g__Butyricimonas	0	0	0	0	0	0	0
g__Exiguobacterium	1.908e-05	1.908e-05	0	0	1.908e-05	0	0
g__Geobacillus	0	0.00364427	1.908e-05	0	0	0	0
g__Lachnospiraceae_FCS020_group	0	0	0	0	0	0	0
g__Parvibacter	0	0	0	0	0	0	0
g__Nocardioides	0	0	5.72399e-05	0	0	0	0
g__Bifidobacterium	0	0	0	0.000515159	0.000496079	0	0
g__RF39	0	0	0	0	0	0	0
g__Phreatobacter	0.000362519	0	0	0	0	0	0
g__F082	0	0	0	0	0	0	0
g__Ruminococcus	1.908e-05	3.81599e-05	1.908e-05	0.00015264	1.908e-05	0	0
g__Actinomadura	0.000267119	0	0	0	0	0	0
g__Brevibacillus	0.000934918	0	1.908e-05	0	0	0.00020988	0
g__Escherichia-Shigella	1.908e-05	0	1.908e-05	0	0	0.00011448	0
g__Monoglobus	0	0	0	0	0	0	0
g__Family_XIII_AD3011_group	0	0	0	0	0	0	1.908e-05
g__D05-2	0.00011448	0.00227052	0	0	0	1.908e-05	0
g__Conexibacter	0.00167904	0	0	0	0	0	0
g__Bilophila	0	0	0	0	0	1.908e-05	0
g__Amycolatopsis	9.53998e-05	0	0	0	0	0	0
g__Chelatococcus	0.00211788	0	1.908e-05	0	0	0.00011448	0
g__Stackebrandtia	0	0	3.81599e-05	0	0	0	0
g__0319-6G20	0	0	0	0	0	3.81599e-05	0
g__Microvirga	0.00017172	0	0	0	0	0	0
g__Promicromonosporaceae	0.00011448	0	0	0	0	7.63199e-05	0
g__Candidatus_Soleaferrea	0	0	0	0	0	0	0
g__Oxalobacter	0	0	0	0	0	0	0
g__Steroidobacteraceae	0.001908	0	0	0	0	0	0
g__PeM15	0	3.81599e-05	0	0	0	1.908e-05	0
g__Negativibacillus	0	0	0	0	0	0.00017172	0
g__Phaselicystis	0.000667799	0	0	0	0	0	0
g__Oscillibacter	0	0	0	0	0	3.81599e-05	0
g__Roseburia	0.0025758	0	0.000763199	0	3.81599e-05	0.00017172	0
g__Paenisporosarcina	0	0	0	0	5.72399e-05	0	0
g__Candidatus_Solibacter	0	0	0	0	0	3.81599e-05	0
g__Craurococcus-Caldovatus	0.000705959	0.0021942	1.908e-05	0	0	0	0
g__Blautia	3.81599e-05	5.72399e-05	0	0	0	3.81599e-05	3.81599e-05
g__Prevotellaceae_UCG-001	0	0	0	0	1.908e-05	5.72399e-05	0
g__Thermobispora	7.63199e-05	0	0	0	0	0.00013356	0
g__Azospirillum	0	0.000362519	5.72399e-05	0.000457919	3.81599e-05	0	7.63199e-05
g__Christensenellaceae_R-7_group	0	0	0	0	0	0	0
g__Aureimonas	3.81599e-05	0	0	0	0	0	0
g__Vampirovibrio	0.00103032	0.00383507	0	0	0	0	0
g__Paeniclostridium	0	0	7.63199e-05	0.00015264	0.00148824	0.00020988	1.908e-05
g__Parabacteroides	1.908e-05	0	0	0	0	0	0
g__Eubacterium_hallii_group	3.81599e-05	1.908e-05	0	0	0	0	0
g__Cellulomonas	1.908e-05	0.00936826	0	0.000610559	0	3.81599e-05	0
g__Saccharimonadales	9.53998e-05	0	0	0.00013356	0	0	0
g__Anaerocolumna	0	0.0110664	0	0	0	0	0
g__Pseudorhodoferax	0	0	0	0	0	0	0
g__Roseiflexus	0.00511343	0	0	0	0	0	0
g__Defluviitaleaceae_UCG-011	0	0	0	0	0	0	0
g__Pantoea	0	0	9.53998e-05	0	0	0	0
g__Brochothrix	0	0	0	0.000419759	0	0	0
g__Cohnella	5.72399e-05	0	0	0	0	0.000534239	0
g__JCM_18997	0.000896758	0	1.908e-05	0	0	0	0
g__Pseudonocardia	5.72399e-05	0	0	0	0	0	0
g__Muribaculaceae	7.63199e-05	0.00013356	1.908e-05	0.000610559	0.00013356	0.00125928	7.63199e-05
g__Odoribacter	0	0	0	0	0	0	0
g__Faecalibaculum	0.0011448	0	0.000953998	0.035546	0.0541489	0.0330656	0.0490546
g__Leucobacter	0	0	0	0.00017172	0	1.908e-05	0
g__Defluviicoccus	0	0	0	0	0.00011448	1.908e-05	0
g__A2	0	0	0	0	0	0	0
g__Nocardiopsis	0	0	1.908e-05	0.00011448	0	5.72399e-05	0
g__Telmatospirillum	0	0	0.00013356	0	0	0	0
g__Providencia	0.00015264	0	0	0	0	0	5.72399e-05
g__Porphyrobacter	0	0	0	0.00011448	0	0	0
g__Proteus	0.0549503	0.00629639	0.00020988	0	0.00234684	0.284063	0.223522
g__Erysipelotrichaceae_UCG-003	1.908e-05	3.81599e-05	0	0	0	0	0
g__Roseisolibacter	0	0	3.81599e-05	0	0	7.63199e-05	0
g__Acidibacter	0.000820438	0	1.908e-05	0	0	0	0
g__Sporocytophaga	0.000534239	0	0	0	0	0	0
g__Lachnospiraceae_UCG-004	3.81599e-05	0.00015264	0	0.000305279	0	0	0
g__Bordetella	0	0	0	0	0	0.000591479	0
g__uncultured	0.123924	0.1066	0.0318826	0.00270935	0.00196524	0.00927286	0.00316727
g__Eubacterium_fissicatena_group	0.0333709	0.035546	0.00207972	0.0796589	0.0694129	0.0748507	0.0955906
g__Sedimentibacter	0	3.81599e-05	0	0	0	0	0
g__Clostridium_sensu_stricto_8	7.63199e-05	0	0	1.908e-05	0	0	0
g__Lachnospiraceae_UCG-006	0	0	1.908e-05	0.00011448	0	7.63199e-05	0
g__Xanthobacter	0.00011448	0	0	0	0	0	0
g__Sporomusa	5.72399e-05	0.00912022	3.81599e-05	0	0	0.00022896	0
g__Pseudarthrobacter	0	1.908e-05	1.908e-05	3.81599e-05	0	0	1.908e-05
g__S0134_terrestrial_group	0.000343439	0	0	0	0	0	0
g__Clostridium_sensu_stricto_1	0.000400679	0.00700235	0	0.0001908	1.908e-05	0.00024804	0.00011448
g__B1-7BS	0.000305279	0	0	0	0	0	0

## Sheet: ABX-SCFAs
Total SCFAs level (mg/g)			Acetic acid level (mg/g)			Propionic acid level (mg/g)
ABX-HFD	ABX-HFD+Pb		ABX-HFD	ABX-HFD+Pb		ABX-HFD	ABX-HFD+Pb
0.00956	0.02077		0.0056	0.01902		0.00038	0.00053
0.00677	0.02683		0.00514	0.0259		0.00037	0.00036
0.01514	0.01194		0.01401	0.0103		0.00038	0.00027
