# Supplementary material for: Lead exposure exacerbates liver injury in high-fat diet-fed mice by disrupting the gut microbiota and related metabolites
Source: Royal Society of Chemistry journal article supplement (doi:10.1039/d3fo05148j), 2024-01-01
Supplement: d3fo05148j3.pdf [file d3fo05148j3.pdf]

1

## Supplementary Materials

2 **Lead exposure exacerbates liver injury in high-fat diet-fed mice by**  
3 **disrupting the gut microbiota and related metabolites**

4 Nana Wang, Yuan Huo, Xue Gao, Yuting Li, Fangru Cheng, Zengli Zhang\*

5 Department of Occupational and Environmental Health, School of Public Health, Soochow  
6 University, 199 Renai Road, Suzhou Jiangsu 215123, China.

7

8 \*Corresponding author: Zengli Zhang;

9 E-mail: zhangzengli@suda.edu.cn

10 Tel: +86-512-6588-0074

11

12

13 **Table S1.** Target genes and primers for Real-time PCR in this study

| Gene             | Forward primer (5'-3') | Reverse primer (5'-3')   |
|------------------|------------------------|--------------------------|
| ZO-1             | GATGTTTATGCGGACGGTGG   | CATTGCTGTGCTCTTAGCGG     |
| ZO-2             | CGCGGGTTCCCACCG        | TCCTCTTTTGGGAATCCTTCTGC  |
| Occludin         | GCCCCTCTTTCTTAGGCG     | TCCCAAGATAAGCGAACCTGC    |
| Claudin-1        | CCCCCATCAATGCCAGGTATG  | AGAGGTTGTTTTCCGGGGAC     |
| Claudin-4        | CTTCATCGGCAGCAACATCG   | TACACATAGTTGCTGGCGGG     |
| E-cadherin       | AACCCAAGCACGTATCAGGG   | GAGTGTTGGGGGCATCATCA     |
| MUC1             | CCCTATGAGGAGGTTTCGGC   | GTGGGGTGACTTGCTCCTAC     |
| MUC2             | ACCTGGAAGGCCAATCAAG    | CTCAGCGTAGTTGGCACTCT     |
| MUC4             | ACCAGATGGCTCTGAACCTA   | TGCATTGGCCTCCATTGTGA     |
| TLR4             | TCCCTGCATAGAGGTAGTTC   | TCAAGGGGTTGAAGCTCAGA     |
| IL-6             | GACAAAGCCAGAGTCCTCAGA  | TGTGACTCCAGCTTATCTCTCTGG |
| IL-1 $\beta$     | TGCCACCTTTTGACAGTGATG  | TGATGTGCTGCTGCGAGATT     |
| TNF- $\alpha$    | GATCGGTCCCCAAAGGGATG   | CCACTTGGTGGTGTGTGTGAGTG  |
| MCP-1            | CACTCACCTGCTGCTACTCA   | GCTTGGTGACAAAACTACAGC    |
| NF- $\kappa$ B   | ATGGCAGACGATGATCCCTAC  | TGTTGACAGTGGTATTTCTGGTG  |
| MYD88            | CAGGAGATGATCCGGCAACT   | CATGCGGCGACACCTTTTC      |
| MLCK             | CACTGTGGTCACAGGATGGG   | TGCTTGCTCCTTGTTCGCAA     |
| Collagen1        | CGATGGATCCCGTTCGAGT    | GAGGCCTCGGTGGACATTAG     |
| $\alpha$ -SMA    | GTCCCAGACATCAGGGAGTAA  | TCGGATACTTCAGCGTCAGGA    |
| Fibronectin      | GGCCACCATTACTGGTCTGG   | GGAAGGGTAACCAGTTGGGG     |
| FASN             | GGCCCTCTGTAAATTGGCT    | CGCTTGTGGTGGACACTTG      |
| PPAR- $\gamma$   | GGGGATGTCTCACAATGCCA   | TGGTCATGAATCCTTGGCCC     |
| ACC              | TTGCCATGGGGATCCCTCTA   | GCTGTTCCCTCAGGCTCACAT    |
| CD36             | GACGTGGCAAAGAACAGCAG   | CATGTCGCAATAGCTTGGCC     |
| FABP1            | TGAAGGCAATAGGTCTGCCC   | CAGGGTGAACCTATTGCGGA     |
| FABP4            | TGTGTGATGCCTTTGTGGGA   | TCCACCAGCTTGTACCATC      |
| AMPK- $\alpha$ 1 | GGGAAAGTGAAGGTGGGCAA   | GATGTGAGGGTGCCTGAACA     |
| ACOX             | CTGGTGGGTGGTATGGTGTG   | ATCATAGCGCCGAGAACAG      |
| CPT-1 $\alpha$   | GCCCTCAAACAGATCTGCCT   | CATGCGTTGGAAGTCTCCCT     |
| CPT-1 $\beta$    | CATGTATCGCCGAAACTGG    | GTGTTCCGGTGTGAGGCCTA     |
| CPT-2            | CCCAAACCCAGTCGTGATGA   | CCAGCCTTTAGAGCACTGCT     |
| SREBP-1c         | GACCCTACGAAGTGCACACA   | GTGGCCTAGTCACAGGTTCC     |
| SCD-1            | GCCCACATGCTCCAAGAGAT   | CTTTGACAGCCGGGTGTTTG     |
| GPAT             | AATAGGCCTCTGGAGGAGCTT  | GCTTTGCTTACTGGTCTGTATC   |
| DGAT1            | GAGGACGAGGTGCGAGAC     | CAGACGATGGCACCTCAGAT     |
| DGAT2            | AACACGCCAAAGAAAGGTGG   | GTAGTCTCGGAAGTAGCGCC     |
| MTPP             | CTCGCTAGAAGCCATCCTGG   | CCCAATGGACAGCAGGATGT     |
| APOB             | AAGCACCTCCGAAAGTACGTG  | CTCCAGCTCTACCTTACAGTTGA  |
| SREBP2           | GCAGCAACGGGACCATTCT    | CCCCATGACTAAGTCCTTCAACT  |
| HMGCR            | AGCTTGCCCGAATTGTATGTG  | TCTGTTGTGAACCATGTGACTTC  |
| GPR41            | TGTCCAATACTCTGCATCTGTG | CACGAGGAACACCAACAGGTA    |
| GPR43            | ATCACAGGAAACGGGAAGCC   | CCAGTCTGGGGTCATTCTCC     |

---

|                |                      |                      |
|----------------|----------------------|----------------------|
| GPR109A        | TTTGTGTTCCGACTCCTGGG | AACAAGATGATGGCCAGGGG |
| $\beta$ -actin | CTGGTCGTACCACAGGCATT | TGCTAGGAGCCAGAGCAGTA |

---

14

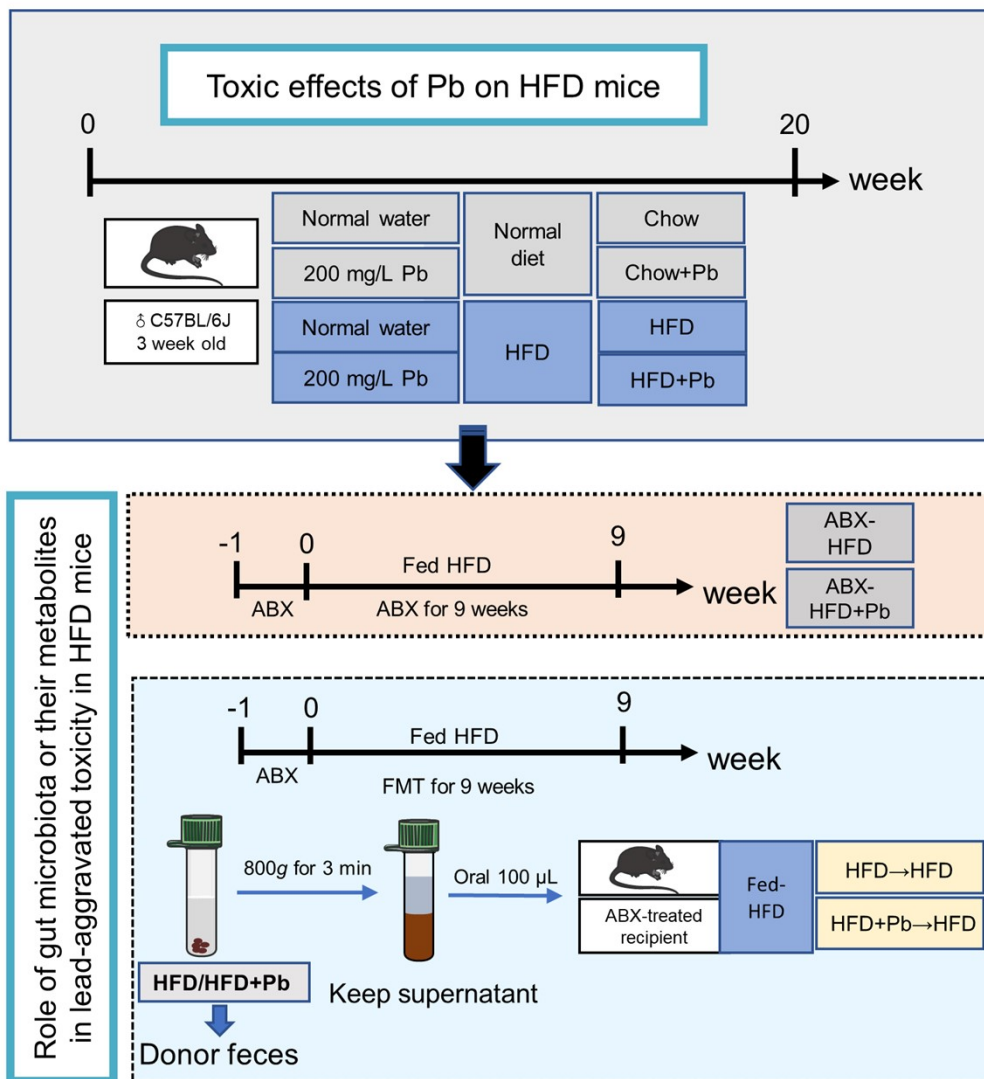

15

16 **Fig. S1** Protocol design of the whole experiment. HFD, high fat diet; Pb, lead; FMT, fecal

17 microbiota transplantation; ABX, antibiotic cocktail

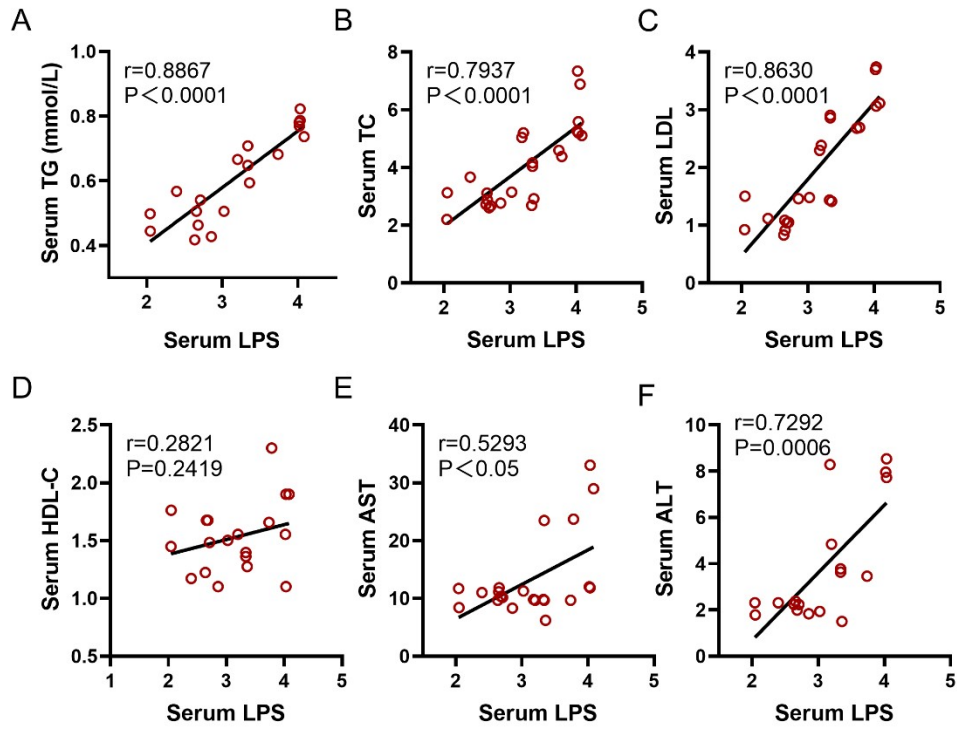

18

19 **Fig. S2** Pearson correlation analysis of serum LPS and related biochemical indices. Data are

20 expressed as mean  $\pm$  SD. A value of  $p < 0.05$  was considered to be significant.

21

A

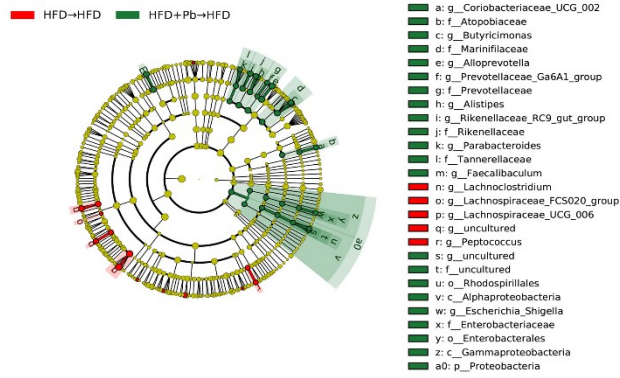

22

23 **Fig. S3** LEfSe analysis of cladogram (A) and LDA distribution histograms (B) (LDA score log<sub>10</sub>

24 >3).

25

B

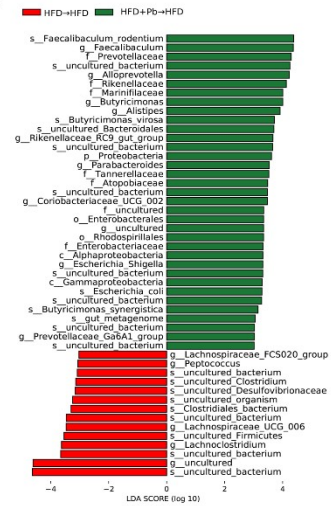

## 26 SUPPLEMENTARY MATERIALS AND METHODS

### 27 1. Verification of the success of pseudo germ-free mice model with antibiotics

#### 28 1.1 Methods

##### 29 1.1.1 Animals and treatments

30 C57BL/6 mice (n=10) were purchased from Shanghai Slack Experimental Animal Co., Ltd  
31 (Shanghai) and placed in a specific pathogen-free environment with an environmental temperature  
32 of  $23\pm 2^{\circ}\text{C}$ , relative humidity of  $50\pm 10\%$ , and a light/dark cycle of 12 hours. After 1 week of  
33 acclimation, all mice were divided into non-antibiotic treated group (NAB, n=5) and antibiotic  
34 treated group (AB, n=5). The AB group was allowed to drink antibiotics for 7 days, while the  
35 NAB group was given conventional treatment. Mice in the NAB and AB groups were humanely  
36 sacrificed to verify the effect of antibiotics on the degree of intestinal disturbance.

37 In detail, mice were fed freely for 7 days with 1 mg/mL ampicillin (Beijing Solarbio Science  
38 & Technology Co. Ltd., China), cefoperazone sodium salt (Shanghai Yuanye Bio-Technology Co.,  
39 Ltd., China), and clindamycin hydrochloride (Beijing Solarbio Science & Technology Co., Ltd.,  
40 China) (1-3).

##### 41 1.1.2 Sample collection

42 Mice were sacrificed after overnight fasting. The contents of mouse jejunum, ileum and  
43 colon were collected, and the contents were placed in 0.9% sterile saline at a ratio of 1:9 for  
44 colony counting.

##### 45 1.1.3 Colony count

46 The intestinal contents were mixed with sterile saline (0.9%) according to the ratio of 1:9. Take  
47 0.1 mL of the mixture and continue to mix with 0.9 mL of sterile saline. And continue this procedure

48 by preparing a 10-fold dilution of the sample. An exact 100  $\mu$ L sample of each concentration was  
49 taken and applied to nutrient agar medium. Incubate at 37°C for 24h, and record the colony number  
50 and bacterial amount (4). Bacterial count (CFU/mL) = number  $\times$  10<sup>n</sup>  $\times$  10 (n, dilution ratio).

#### 51 1.1.4 Statistical analysis

52 All values were expressed as mean  $\pm$  standard deviation (SD). The independent sample *t* test  
53 was used to compare the differences between the two groups. *p* < 0.05 was considered statistical  
54 significance.

### 55 1.2 Results

#### 56 1.2.1 The result of colony count

57 The results in Table S1 show that the number of colonies in the jejunum, ileum and colon of  
58 the AB group was significantly lower than that of the NAB group after 24 h of incubation. The  
59 results indicate that the antibiotic-treated pseudo-sterile mouse model is successful and could be  
60 used for fecal microbial transplantation experiments.

61 **Table S2.** Effect of antibiotic treatment on bacterial colonies of jejunum, ileum, and colon of mice.

| bacterial colonies | NAB (CFU/mL)                                                       | AB (CFU/mL)                                                           |
|--------------------|--------------------------------------------------------------------|-----------------------------------------------------------------------|
| jejunum            | 2.75 $\times$ 10 <sup>6</sup> $\pm$ 9.57 $\times$ 10 <sup>5</sup>  | 3.83 $\times$ 10 <sup>5</sup> $\pm$ 2.53 $\times$ 10 <sup>5</sup> **  |
| ileum              | 2.87 $\times$ 10 <sup>7</sup> $\pm$ 4.04 $\times$ 10 <sup>6</sup>  | 4.67 $\times$ 10 <sup>6</sup> $\pm$ 5.8 $\times$ 10 <sup>5</sup> ***  |
| colon              | 2.93 $\times$ 10 <sup>10</sup> $\pm$ 5.13 $\times$ 10 <sup>9</sup> | 3.47 $\times$ 10 <sup>8</sup> $\pm$ 1.00 $\times$ 10 <sup>8</sup> *** |

62 Data are expressed as mean  $\pm$  SD. AB vs NAB, \**p*<0.05, \*\**p*<0.01, \*\*\**p*<0.001, \*\*\*\**p*<0.0001.

### 63 2 Biochemical analyses

64 Serum insulin, diamine oxidase (DAO) and lipopolysaccharide (LPS) were detected by mouse  
65 ELISA kit (Quanzhou Kainodibio Co., Ltd., China). Serum content of total cholesterol (TC),  
66 triglyceride (TG), low-density lipoprotein cholesterol (LDL-C), and high-density lipoprotein  
67 cholesterol (HDL-C) were determined using commercial kits (Jiancheng Bio Co., Nanjing, China).



68 Serum alanine transaminase (ALT), and glutamic oxaloacetic transaminase (AST) were measured  
69 by an automated blood biochemistry analyzer (C8000, Abbott Laboratories, Abbott Park, IL, USA).

### 70 **3 Gut microbiota analysis**

71 The intestinal contents (n=3-5/group) were used for gut microbiota assays. Briefly, DNA was  
72 extracted from the samples, and the purity of the DNA was tested by 1% agarose gel electrophoresis.  
73 The 16S V3-V4 region was amplified; the target band size was detected by 2% agarose gel  
74 electrophoresis and purified by recovery with magnetic beads. Libraries were sequenced on the  
75 NovaSeq250 platform. Alpha diversity was described by richness (Chao1 and Observed\_species)  
76 and diversity (Shannon and Simpson). Beta diversity was expressed using a weighted uniform  
77 method based on PCoA. The composition of microorganisms was analyzed at the phylum and genus  
78 level. Microbial biomarkers between different groups were analyzed using LEfSe. Regarding the  
79 analysis of gut microbiota results, among the four groups of Chow, Chow+Pb, HFD, and HFD+Pb,  
80 the Chow group was used as the control group, the FMT experiment used the HFD→HFD group as  
81 the control group, and the ABX experiment used the ABX-HFD group as the control group. Alpha  
82 diversity and species composition were statistically analyzed by One-way ANOVA with Tukey post  
83 hoc test (more than two groups) and independent samples *t*-test (two groups). Correlations between  
84 gut microbiota and physiological indicators were analyzed using Spearman's correlation.

### 85 **4 SCFA analysis**

86 SCFA content in feces was measured according to the previous method (5). First, 0.1 g of feces  
87 was weighed to which 1 mL 50% phosphoric acid was added. The mixture was ground for 5 min  
88 and centrifuged at  $21000 \times g$  at 4 °C for 10 min to obtain supernatant. After diluting 0.01g of  
89 supernatant with 1.8 mL of 50% phosphoric acid solution, the mixture vortexed for 30s and

90 centrifuged for another 30s. Added to 20  $\mu$ L of the diluted supernatant was 10  $\mu$ L 200 mM 3-  
91 NPH-HCl, 10  $\mu$ L 200mM EDC-HCl, 80  $\mu$ L 50% phosphoric acid, 50  $\mu$ L 7% Pyridine, and 1  $\mu$ L  
92 isotope internal standard solution. This mixture was vortexed for 1min, centrifuged for 1 min,  
93 derivatized at 40°C for 30 min and centrifuged at 18000  $\times$  g for 1 min at 4 °C. Twenty  $\mu$ L of the  
94 derivatized reaction solution was added to 280  $\mu$ L of 50% phosphoric acid solution (containing  
95 0.1% formic acid), vortex mixed for 30 s, and centrifuged at 18000  $\times$  g for 10 min at 4°C. The  
96 resulting supernatant was placed in an injection bottle for LC-MS/MS analysis.

## 97 REFERENCES

- 98 1. Li N, Xie Q, Chen Q, Evivie SE, Liu D, Dong J, Huo G, Li B. 2020. Cow, Goat, and Mare Milk  
99 Diets Differentially Modulated the Immune System and Gut Microbiota of Mice Colonized by  
100 Healthy Infant Feces. *J Agric Food Chem* 68:15345-15357.
  - 101 2. Staley C, Kaiser T, Beura LK, Hamilton MJ, Weingarden AR, Bobr A, Kang J, Masopust D,  
102 Sadowsky MJ, Khoruts A. 2017. Stable engraftment of human microbiota into mice with a single  
103 oral gavage following antibiotic conditioning. *Microbiome* 5:87.
  - 104 3. Chen Q, Xie Q, Jiang C, Evivie SE, Cao T, Wang Z, Zhao L, Liang S, Li B, Huo G. 2022. Infant  
105 formula supplemented with 1,3-olein-2-palmitin regulated the immunity, gut microbiota, and  
106 metabolites of mice colonized by feces from healthy infants. *J Dairy Sci* 105:6405-6421.
  - 107 4. Chen Q, Yin Q, Xie Q, Jiang C, Zhou L, Liu J, Li B, Jiang S. 2022. 2'-Fucosyllactose Promotes  
108 the Production of Short-Chain Fatty Acids and Improves Immune Function in Human-Microbiota-  
109 Associated Mice by Regulating Gut Microbiota. *J Agric Food Chem* 70:13615-13625.
  - 110 5. Zhao L, Zhang F, Ding X, Wu G, Lam YY, Wang X, Fu H, Xue X, Lu C, Ma J, Yu L, Xu C,  
111 Ren Z, Xu Y, Xu S, Shen H, Zhu X, Shi Y, Shen Q, Dong W, Liu R, Ling Y, Zeng Y, Wang X,  
112 Zhang Q, Wang J, Wang L, Wu Y, Zeng B, Wei H, Zhang M, Peng Y, Zhang C. 2018. Gut bacteria  
113 selectively promoted by dietary fibers alleviate type 2 diabetes. *Science* 359:1151-1156.
- 114
